# Supplementary material for: Generation and transplantation of reprogrammed human neurons in the brain using 3D microtopographic scaffolds
Source: PubMed Central journal article supplement (PMC4800432; doi:10.1038/ncomms10862), 2016-03-17
Supplement: ncomms10862-s1.pdf [file ncomms10862-s1.pdf]

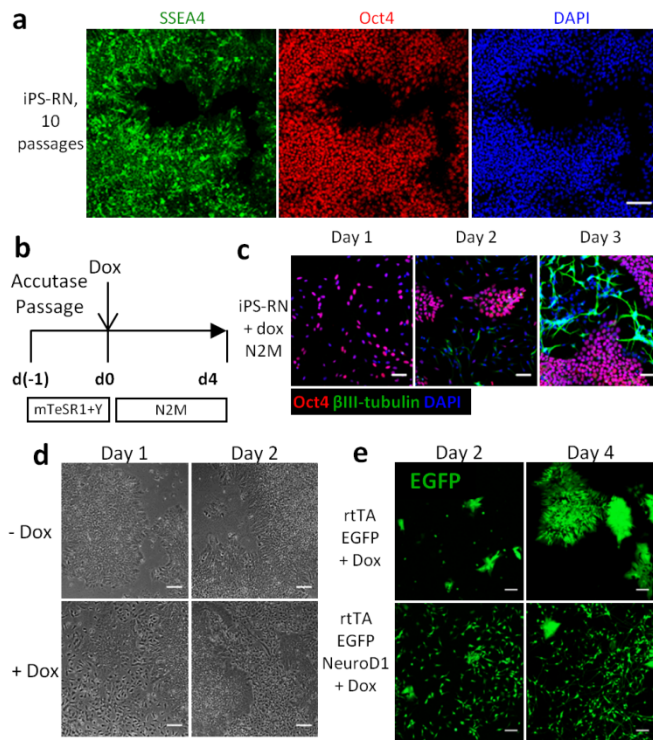

**Supplementary Figure 1: Derivation and characterization of RN-iPS cell lines.** (a) RN-iPS cells maintain expression of pluripotency markers OCT4 and SSEA4 after 10 passages in mTeSR-1 medium. (b) Schematic of plating and doxycycline (dox) addition for generation of iNs from RN-iPS cells. (c) Many RN-iPS cells lose Oct4 and gain  $\beta$ III-tubulin expression 3 days after dox addition in N2M. (d) Bright field images after 1 or 2 days of dox treatment reveal that in the absence of dox, cells retain a characteristic undifferentiated iPS cell morphology, where in the presence of dox, cells around the periphery of colonies begin to take on an early neuronal cell morphology. (e) iPS cells infected with rtTA and EGFP show EGFP expression 2 and 4 days after dox addition, but maintain an undifferentiated morphology. iPS cells infected with rtTA, EGFP, and NeuroD1 also show EGFP expression 2 and 4 days after dox addition, but also show a distinct conversion to progressively maturing neuronal morphologies. Scale bar = 100 $\mu$ m (a, d-e), 50  $\mu$ m (c).

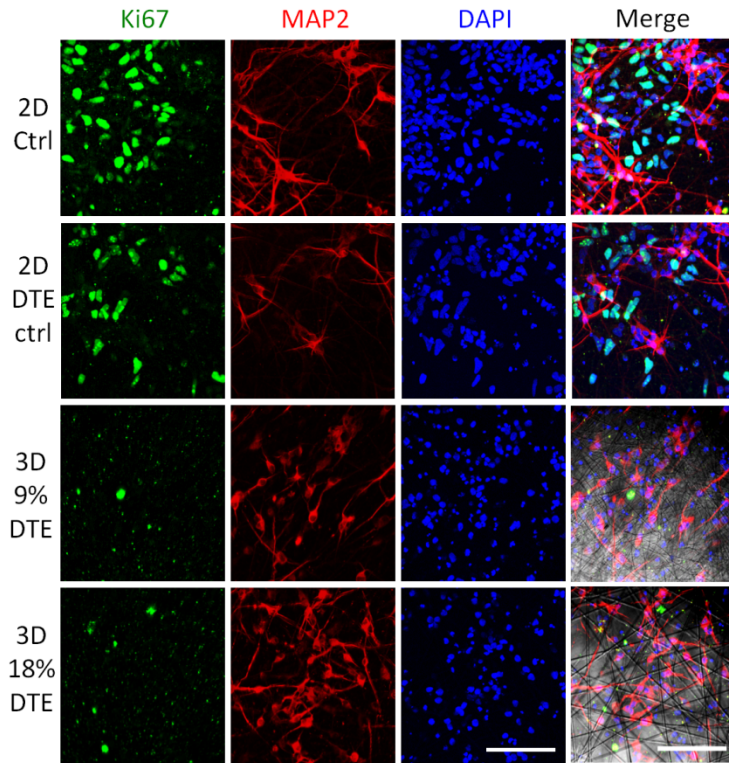

**Supplementary Figure 2: Comparison of neuronal selection and maturation in 2D and 3D substrates.** iN populations robustly express microtubule-associated protein 2 (MAP2) in 2D and 3D conditions, while populations of unconverted, proliferative Ki67-expressing iPS cells persist in iN populations plated in 2D conditions. Scale bar = 100  $\mu$ m.

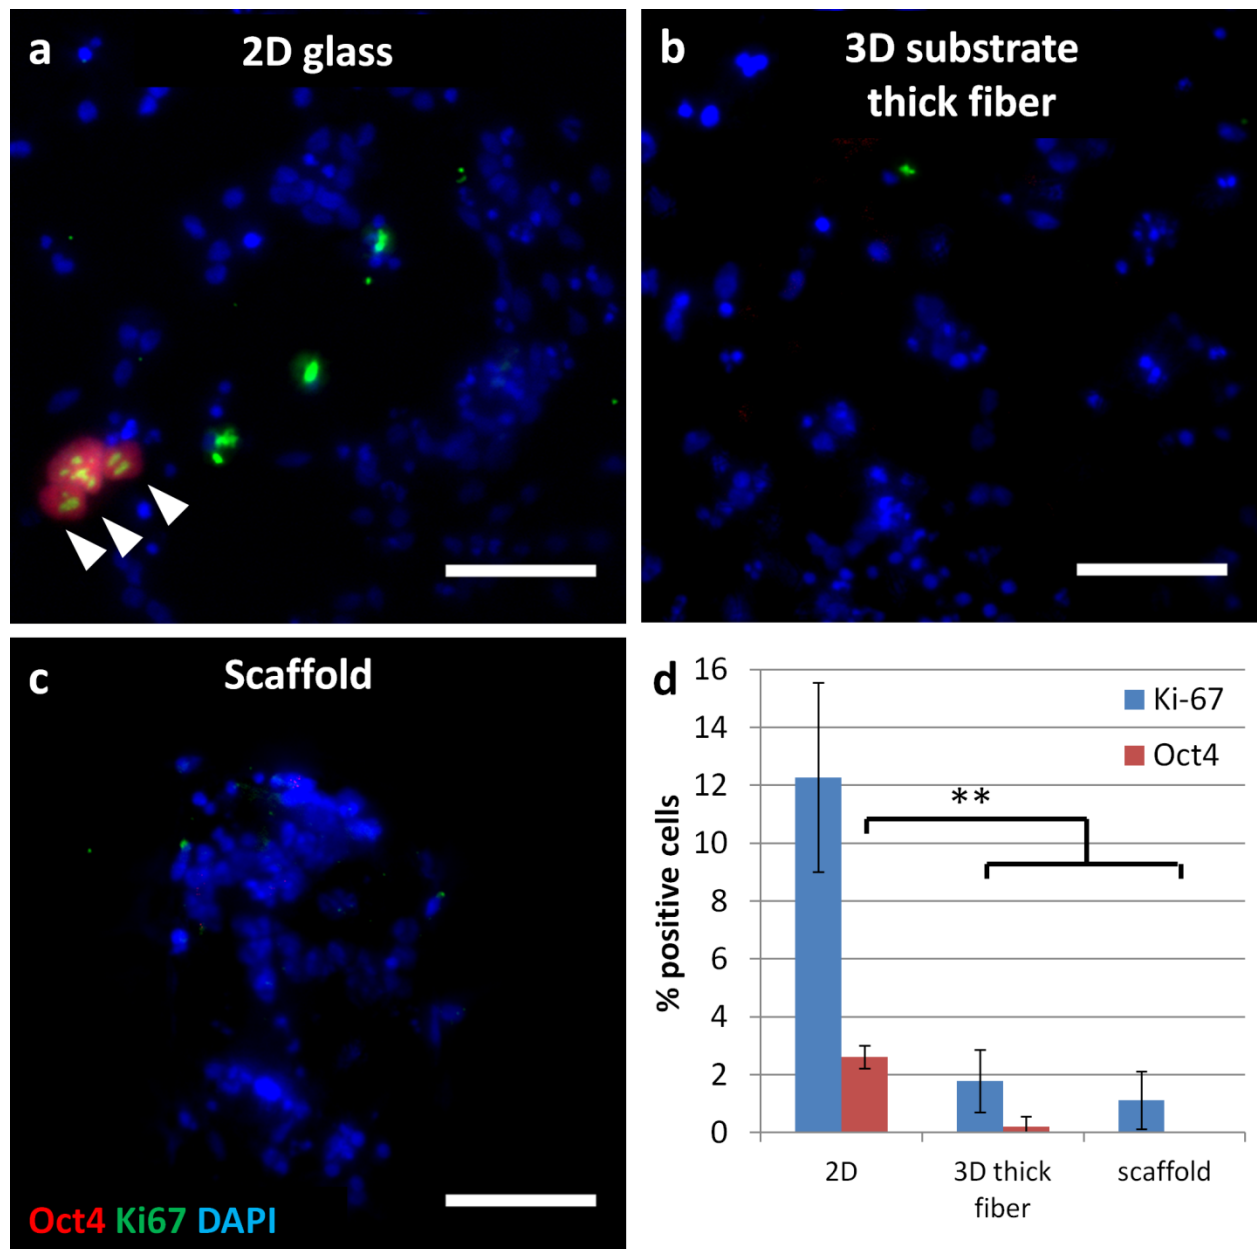

**Supplementary Figure 3: Characterization of unconverted induced neuronal cells.** (a) iNs replated onto 2D glass surfaces after initiating reprogramming contained populations of Ki67+ cells (green), a subpopulation of Ki-67+ cells were also Oct4+ (red). iNs replated onto thick fiber 3D substrates (b) or scaffolds (c) similarly had significantly fewer of both Ki-67+ and Oct4+ cells, \*\* $P < 0.01$  by 1-way ANOVA, , all error bars presented as mean  $\pm$  1 standard deviation.

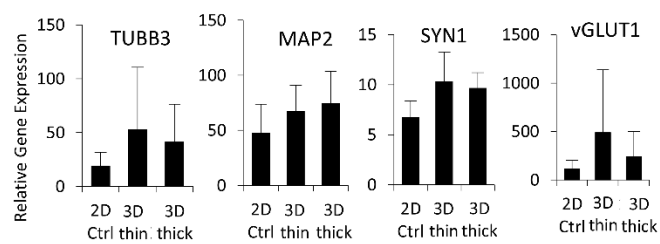

**Supplementary Figure 4: qRT-PCR analysis of induced neuron gene expression.** Analysis of gene expression profiles reveals similar gene expression profiles between the three substrates, all error bars presented as mean  $\pm$  1 standard deviation.

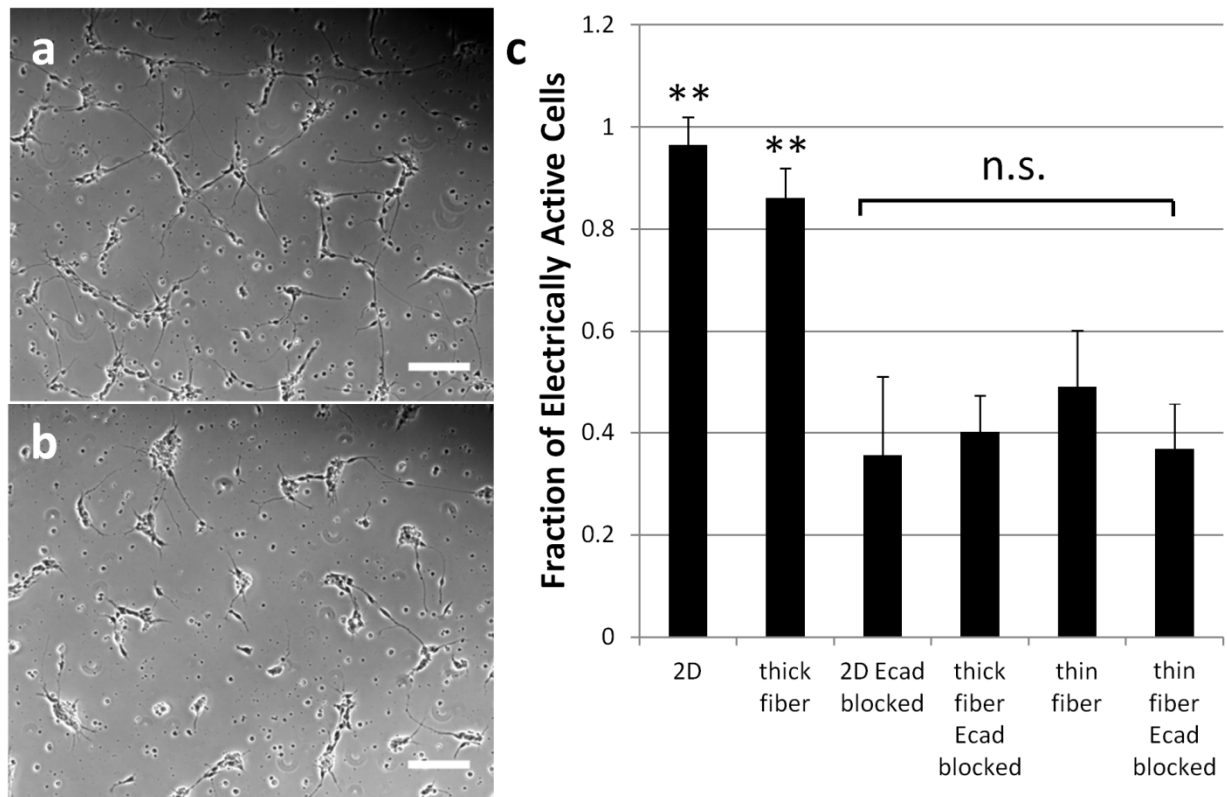

**Supplementary Figure 5: Fiber architecture controls neuronal development via cell-cell contact.** iN populations were incubated with  $200 \mu\text{g mL}^{-1}$  E-cadherin antibody for 15 minutes prior to seeding onto substrates, either 2D or thick and thin fiber 3D substrates. Compared to uninhibited iN cells in 2D (a), iN cells with inhibited E-cadherin dependent cell-cell contact displayed reduced outgrowth in 2D (b). Inhibited cell-cell contact resulted in decreased activity measured by calcium imaging for iNs on 2-D and thick fiber substrates, but did not decrease activity in thin fiber substrates (c). \*\* $P < 0.01$  by 1-way ANOVA relative to respective Ecad blocked conditions. n.s. = not significant. Scale bar =  $150 \mu\text{m}$ , all error bars presented as mean  $\pm$  1 standard deviation.

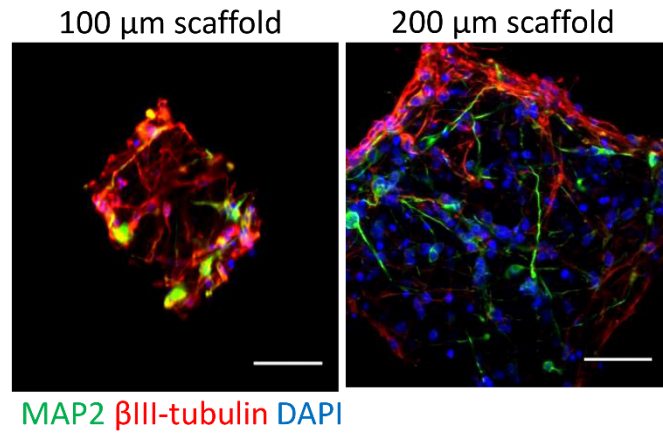

**Supplementary Figure 6: Characterization of neuronal maturation on microscale scaffolds.**

Immunocytochemistry for pan-neuronal markers microtubule-associated protein 2 (MAP2) and  $\beta$ III-tubulin in iNs after 4 days in 100 and 200  $\mu\text{m}$  scaffold. Scale bar: 50  $\mu\text{m}$ .

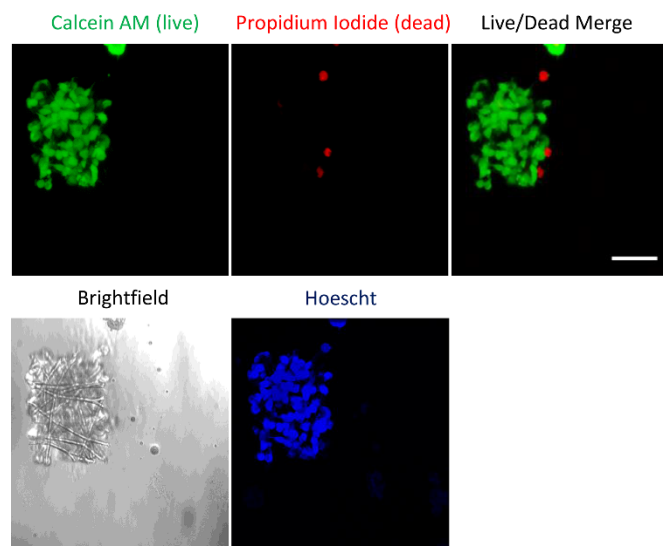

**Supplementary Figure 7: Live/dead imaging in a 100  $\mu\text{m}$  scaffold.** On average, there were  $82.6 \pm 13.1$  live cells per scaffold. Scale bar: 50  $\mu\text{m}$ .

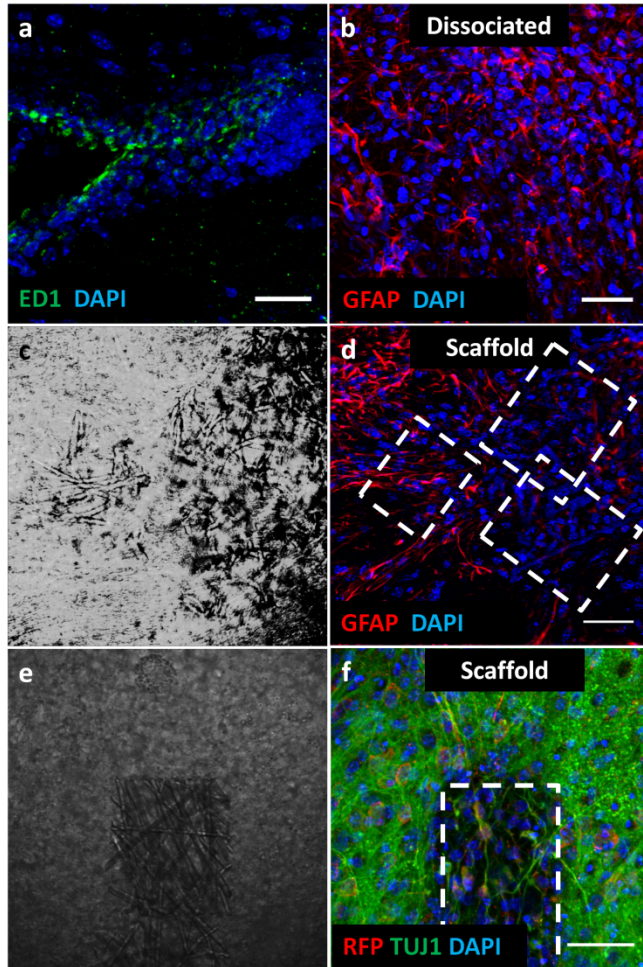

**Supplementary Figure 8: Host response to transplanted scaffolds.** (a) Activated microglia expressing ED1 or CD68 were seen in injection sites in mice receiving both dissociated and scaffold-supported iNs. Astrocytes, expressing glial fibrillary acidic protein (GFAP) were seen near the injection site in both mice receiving dissociated (b) and scaffold-supported iNs (c-d). Some degree of host tissue ingrowth was observed near transplanted scaffolds with no iNs nearby, visualized using brightfield (e) and immunostaining for  $\beta$ III-tubulin and RFP, to detect fluorolabeled transplanted cells (f). Scale bars = 50  $\mu$ m.



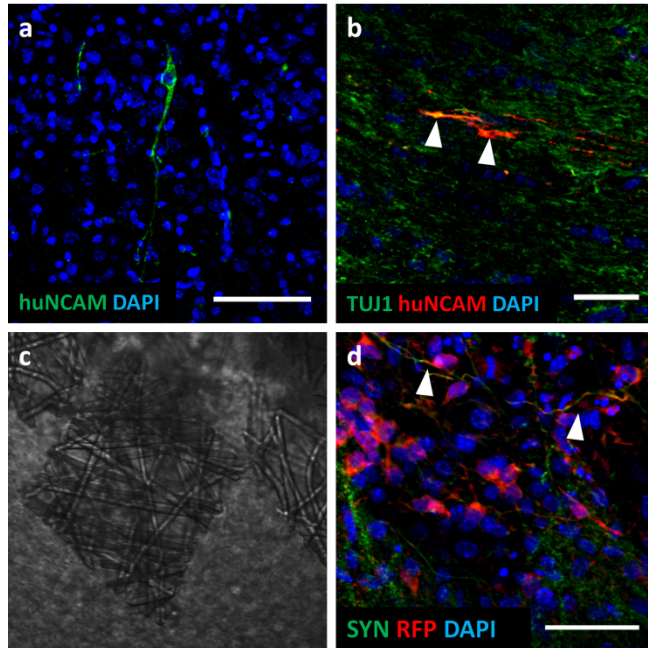

**Supplementary Figure 9: Characterization of transplanted iNs.** (a) 3 weeks post-transplantation into mouse striatum, iNs expressed neural cell adhesion molecule CD56, detected with a human specific antibody. Scale bar = 100  $\mu\text{m}$ . (b) Cells that positively expressed human specific neural cell adhesion (red) molecule also expressed  $\beta$ -III tubulin (green), indicated by arrowheads pointing to yellow colored neurites. Scale bar = 50  $\mu\text{m}$ . Scaffold supported RFP-labelled iNs (red), located near brightfield scaffolds (c) were found to express synaptophysin (green) (d), two such red-colored neurites with distinct green regions are indicated with arrowheads, scale bar = 50  $\mu\text{m}$ .

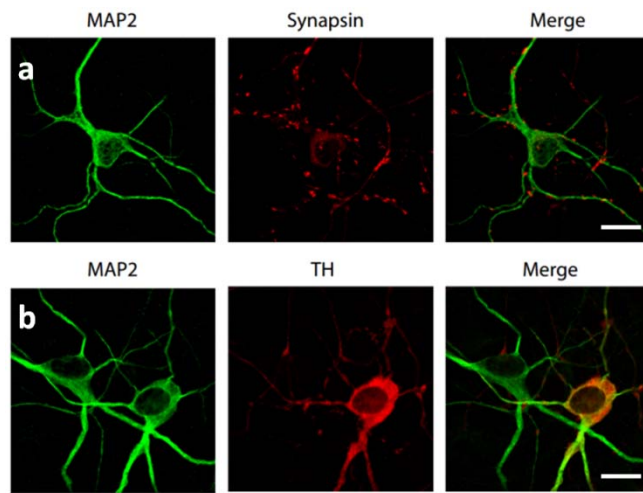

**Supplementary Figure 10: Induced DA neurons stain positively for mature neuronal markers and dopamine markers.** (a) iDA neurons express microtubule-associated protein 2 (MAP2) and Synapsin. (b) iDA neurons express MAP2 and tyrosine hydroxylase (TH). Scale bars = 20  $\mu\text{m}$ .

**Supplementary Table 1: Antibodies used for immunocytochemistry.**

| Antibody            | Species | Isotype | Dilution        | Company          | Product # |
|---------------------|---------|---------|-----------------|------------------|-----------|
| $\beta$ III-tubulin | mouse   | IgG 2a  | 1:1000          | Covance          | MMS-435P  |
| Map2                | mouse   | IgG 1   | 1:500           | BD Biosciences   | 556320    |
| Synaptophysin       | rabbit  | IgG     | 1:250           | Millipore        | 04-1019   |
| Oct4                | mouse   | IgG1    | 1:1000          | Millipore        | MAB4401   |
| TH                  | mouse   | IgG 2a  | 1:100-<br>1:500 | Millipore        | MAB5280   |
| GFP                 | chicken | IgY     | 1:1000          | abcam            | ab13970   |
| RFP                 | rabbit  | IgG     | 1:100           | Abcam            | ab62341   |
| huNCAM              | mouse   | IgG1    | 1:100           | Santa Cruz       | sc-106    |
| HuNu                | mouse   | IgG1    | 1:100           | Millipore        | MAB1281   |
| ki67                | rabbit  | IgG     | 1:50-<br>1:100  | abcam            | ab15580   |
| E-cadherin          | mouse   | IgG1    | 1:10            | Invitrogen       | 13-1700   |
| vgat                | mouse   | IgG3    | 1:1000          | synaptic systems | 131 001   |
| vglut               | rabbit  | IgG     | 1:1000          | synaptic systems | 135 302   |
| PSD-95              | mouse   | IgG2ak  | 1:500           | Millipore        | MABN68    |

**Supplementary Table 2: Taqman gene expression assays used for qRT-PCR.**

| Gene    | Taqman Gene Expression Assay |
|---------|------------------------------|
| GAPDH   | Cat#: 4326317E               |
| TUBB3   | Hs00801390_s1                |
| MAP2    | Hs00258900_m1                |
| SYN1    | Hs00199577_m1                |
| SLC17A7 | Hs00220404_m1                |
